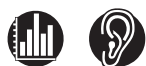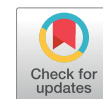

# Childhood BMI and Fasting Glucose and Insulin Predict Adult Type 2 Diabetes: The International Childhood Cardiovascular Cohort (i3C) Consortium

*Diabetes Care* 2020;43:2821–2829 | <https://doi.org/10.2337/dc20-0822>

## OBJECTIVE

To examine childhood BMI, fasting glucose, and insulin in relation to incident adult type 2 diabetes mellitus (T2DM).

## RESEARCH DESIGN AND METHODS

We used data from the International Childhood Cardiovascular Cohort (i3C) Consortium. Data included childhood (age 3–19 years) measurements obtained during the 1970s–1990s; a health questionnaire, including self-report of adult T2DM (occurrence age, medication use) obtained at mean age 40 years; and a medical diagnosis registry (Finland).

## RESULTS

The sample included 6,738 participants. Of these, 436 (6.5%) reported onset of T2DM between ages 20 and 59 (mean 40.8) years, and 86% of them reported use of a confirmed antidiabetic medication. BMI and glucose (age and sex standardized) were associated with incident T2DM after adjustment for cohort, country, sex, race, age, and calendar year of measurement. Increasing levels of childhood BMI and glucose were related to an incrementally increased risk of T2DM beginning at age 30 years, beginning at cut points <95th percentile for BMI and <100 mg/dL for glucose. Insulin was positively associated with adult T2DM after adjustment for BMI and glucose and added to T2DM discrimination.

## CONCLUSIONS

Childhood BMI and glucose are predictors of adult T2DM at levels previously considered to be within the normal range. These easy-to-apply measurements are appealing from a clinical perspective. Fasting insulin has the potential to be an additional predictor.

According to the most recent estimates from the World Health Organization (2014), diabetes (mostly type 2 diabetes mellitus [T2DM]) affects 8.5% (422 million) of the total world population aged ≥18 years (1). Although T2DM historically has been an adult disease, its precursors are found in childhood (2–4), and body composition and pathways of growth as early as in utero have been associated with risk of developing T2DM (5). Thus, it is relevant to conduct studies in childhood in an attempt to identify factors associated with the risk for and development of T2DM.

Tian Hu,<sup>1</sup> David R. Jacobs Jr.,<sup>1</sup> Alan R. Sinaiko,<sup>2</sup> Lydia A. Bazzano,<sup>3</sup> Trudy L. Burns,<sup>4</sup> Stephen R. Daniels,<sup>5</sup> Terry Dwyer,<sup>6</sup> Nina Hutri-Kähönen,<sup>7</sup> Markus Juonala,<sup>8,9,10</sup> Kari A. Murdy,<sup>2</sup> Ronald J. Prineas,<sup>11</sup> Olli T. Raitakari,<sup>12,13,14</sup> Elaine M. Urbina,<sup>15,16</sup> Alison Venn,<sup>17</sup> Jessica G. Woo,<sup>16,18</sup> and Julia Steinberger<sup>2</sup>

<sup>1</sup>Division of Epidemiology and Community Health, School of Public Health, University of Minnesota, Minneapolis, MN

<sup>2</sup>Department of Pediatrics, University of Minnesota School of Medicine, Minneapolis, MN

<sup>3</sup>Department of Epidemiology, Tulane University School of Public Health and Tropical Medicine, New Orleans, LA

<sup>4</sup>Department of Epidemiology, College of Public Health, University of Iowa, Iowa City, IA

<sup>5</sup>Department of Pediatrics, University of Colorado School of Medicine, Aurora, CO

<sup>6</sup>Oxford Martin School, Oxford University, Oxford, U.K.

<sup>7</sup>Department of Pediatrics, Tampere University Hospital, and Faculty of Medicine and Health Technology, Tampere University, Tampere, Finland

<sup>8</sup>Department of Internal Medicine, University of Turku, Turku, Finland

<sup>9</sup>Division of Medicine, Turku University Hospital, Turku, Finland

<sup>10</sup>Murdoch Children's Research Institute, Parkville, Victoria, Australia

<sup>11</sup>Division of Public Health Science, Wake Forest University, Winston-Salem, NC

<sup>12</sup>Centre for Population Health Research, University of Turku and Turku University Hospital, Turku, Finland

<sup>13</sup>Research Centre of Applied and Preventive Cardiovascular Medicine, University of Turku, Turku, Finland

<sup>14</sup>Department of Clinical Physiology and Nuclear Medicine, Turku University Hospital, Turku, Finland

<sup>15</sup>The Heart Institute, Cincinnati Children's Hospital Medical Center, Cincinnati, OH

<sup>16</sup>Department of Pediatrics, University of Cincinnati College of Medicine, Cincinnati, OH

<sup>17</sup>Menzies Institute for Medical Research, University of Tasmania, Hobart, Tasmania, Australia

<sup>18</sup>Division of Biostatistics and Epidemiology, Cincinnati Children's Hospital Medical Center, Cincinnati, OH

Corresponding author: Julia Steinberger, [stein055@umn.edu](mailto:stein055@umn.edu)

Received 13 April 2020 and accepted 7 August 2020

This article contains supplementary material online at <https://doi.org/10.2337/figshare.12795167>.

This article is featured in a podcast available at <https://www.diabetesjournals.org/content/diabetes-core-update-podcasts>.

© 2020 by the American Diabetes Association. Readers may use this article as long as the work is properly cited, the use is educational and not for profit, and the work is not altered. More information is available at <https://www.diabetesjournals.org/content/license>.

Evidence from population-based studies has shown an association between childhood obesity and adult T2DM (5–11), and a few studies have suggested that childhood glucose levels are associated with the development of prediabetes and T2DM (7,12–15). While childhood insulin has been reported to predict T2DM in young adulthood (13), it has also been reported that adolescent insulin measurements were not related to adult T2DM (16). However, the levels of childhood BMI and glucose associated with adult T2DM have not been well defined (14,17), and little information is available on whether childhood insulin might add to prediction of adult T2DM beyond BMI and glucose. Using data from a collaboration of seven cohorts recruited in childhood and followed with repeated measures into adulthood, this study aims to develop a childhood risk profile for adult T2DM (18). We hypothesized that childhood BMI and glucose predict the risk of adult T2DM, and childhood insulin adds prediction to BMI and glucose.

## RESEARCH DESIGN AND METHODS

### Study Sample

Participants for this study were drawn from the International Childhood Cardiovascular Cohort (i3C) Consortium, a collaboration of seven long-standing cohorts from three continents, including the Young Finns Study, Finland; the Childhood Determinants of Adult Health Study, Australia; the Princeton Lipid Research Study and the National Heart, Lung, and Blood Institute Growth and Health Study, Cincinnati, OH; the Bogalusa Heart Study, Bogalusa, LA; the Minneapolis Children's Cohorts, Minneapolis, MN; and the Muscatine Study, Muscatine, IA. The children and adolescents in these cohorts were recruited during the 1970s–1990s, with baseline assessment of cardiovascular risk factors. In 2015–2019, participants in Australia and the U.S. were recontacted and completed the Heart Health Survey (HHS) questionnaire, including self-report of diabetes and a medication history, either online or by telephone interview. Participants in the Finnish cohort were followed up through 2011, but their data in the Finnish national medical registry were available through 2018.

The i3C Consortium was established for general purposes of cardiovascular epidemiology. Because recruitment of participants and childhood data collection

occurred before forming the consortium, each of the seven cohorts had individually designed protocols, and the content and age of data collection by the cohorts was not uniform (18). The current study does not include data from the Childhood Determinants of Adult Health Study and the Muscatine Study because these studies do not have childhood measurements of blood glucose. Thus, the current study includes four U.S. cohorts and one Finnish cohort (childhood BMI and blood glucose data from the Young Finns Study, the Princeton Lipid Research Study, the National Heart, Lung, and Blood Institute Growth and Health Study, the Bogalusa Heart Study, and the Minneapolis Insulin Study). Childhood insulin was not available in the Princeton study, and childhood glucose was available from one-half of the participants from the Young Finns Study. The base sample for studies of childhood anthropometric and laboratory measures predicting new-onset T2DM at or after age 20 years was all participants with follow-up age  $\geq 20$  years and with any childhood anthropometric or laboratory measure available ( $N = 18,626$ ). In the analytic sample ( $n = 6,738$ ), we included only White and Black participants with childhood BMI and glucose measurements. Fasting insulin was also available in a subset ( $n = 5,196$  of 6,738). In secondary analysis of BMI and insulin, not requiring glucose measurement, 6,576 participants were available.

### Childhood Measurements

BMI, fasting blood glucose, and insulin were measured at least once during ages 3–19 years, with the laboratory analyses performed at each cohort site in nationally monitored facilities. These data were available in subsets of participants, depending on the study protocol in each cohort throughout childhood. Height was measured with a stadiometer and weight with a calibrated scale. BMI was calculated as  $\text{kg/m}^2$ . Information on cohort, country, age, and calendar year of measurement, sex, and race was available for each cohort.

### Adult T2DM Ascertainment

Data on T2DM were based on the self-reported HHS conducted in the U.S. and Australian cohorts in 2015–2019; data from Finland were obtained from a national registry, and in a smaller group of Finnish individuals, blood glucose and hemoglobin  $A_{1c}$  were available through

2018. Historical and current medication information was also self-reported concurrently. We excluded participants who reported onset of diabetes before age 20 years to separate child predictor data from adult outcome data. Most of the seven participants who reported adolescent T2DM were severely obese in childhood, but the sample size was insufficient for meaningful analysis.

All previous examinations and the current HHS questionnaire were approved by each institutional review board. Parental consent and signed participant assent were obtained for individuals age  $< 18$  years at the time of childhood examinations. For adults, the study was explained online in a preface to the HHS; completion of the questionnaire was taken to be implied consent. For the HHS completed by telephone interview, the questionnaire was administered by study coordinators who explained the study to the participants using standardized language, addressed participant questions, and verified the participant's willingness to participate before conducting the HHS.

### Statistical Analysis

We computed the z-scores for BMI, fasting glucose level, and log-transformed insulin [ $\ln(\text{insulin})$ ] and then averaged across childhood visits (ages 3–19 years), with median (interquartile range) numbers of childhood BMI, glucose, and  $\ln(\text{insulin})$  of 3 (2, 4), 1 (1, 3), and 2 (1, 3), respectively, for each participant. A z-score was based on age- and sex-specific mean and SD values obtained from the i3C cohorts (age categories 3–5, 6–8, 9–11, 12–14, 15–17, and 18–19 years). This approach assumes that use of z-scores in variables centered at their group means equalizes across age-groups and sex groups. Supplementary Table 1 provides corresponding age- and sex-specific natural unit values of BMI, fasting glucose, and fasting insulin for z-scores of  $-1$ , 0, 0.5, and 1. The average of the z-scores is the most statistically comprehensive method for using repeated measures. We separately analyzed the first measure or last measure as the childhood predictor of T2DM; the estimated mean z-score led to an as large or larger regression coefficient as any individual measure (data not shown). We also analyzed separately by age 3–11 and 12–19 years. Substantial differences in findings do not appear.

We performed Cox regression analysis to predict the risk of adult T2DM with the z-scores of BMI and glucose and ran a separate model, including the risk score, defined as mean of childhood BMI and glucose z-scores. Adjustment was for individual mean age and calendar year across childhood visits, sex, race, country, and cohort. The time to event was computed as age at T2DM occurrence or censoring minus individual mean age across childhood visits. We calculated the unadjusted cumulative incidence for adult T2DM using the Kaplan-Meier method stratified by childhood predictor categories, which were equal interval and open-ended extreme. Given the perception that childhood obesity is a strong predictor of adult T2DM, we also examined the associations in subsets of participants with BMI below or above the age- and sex-specific average.

To examine whether childhood insulin predicts the risk of adult T2DM independent of childhood BMI and glucose, we examined the association between childhood  $\ln(\text{insulin})$  and risk of incident adult T2DM with adjustment for childhood BMI and glucose or adjustment for BMI only. If  $\ln(\text{insulin})$  was significantly associated with incident T2DM with adjustment, we stratified T2DM incidence according to categories of a risk score formed from childhood BMI, glucose, and  $\ln(\text{insulin})$  by the category of the risk score formed

from childhood BMI and glucose to calculate absolute risks before and after reclassification by adding childhood  $\ln(\text{insulin})$ . We examined the associations within each race group. We also examined childhood systolic blood pressure, total cholesterol, LDL cholesterol, HDL cholesterol, triglycerides, and smoking and found no confounding. All analyses were conducted using SAS 9.4 statistical software (SAS Institute, Cary, NC).

## RESULTS

### Sample Description

There were 18,626 i3C participants with self-reported adult T2DM status in the HHS or objectively diagnosed adult T2DM in the Young Finns Study, followed after age 19 years, and a measure of any of the anthropometric and laboratory data. As shown in Supplementary Table 2, T2DM prevalence was not different between the analytic sample ( $n = 6,738$ ) and the larger i3C sample ( $N = 18,626$ ) in this report (6.5% vs. 6.0%,  $P = 0.18$ ). Nevertheless, there were differences between those who had or did not have the requisite measurements. The analytic sample included more females and Blacks and had higher childhood BMI, lower childhood glucose, and lower insulin z-scores, and the childhood measurements were obtained at a slightly younger age. Participants who were not included ( $n = 11,888$ ) in this report were mostly from

two cohorts (Childhood Determinants of Adult Health Study and Muscatine Study), where childhood data on glucose and insulin were not obtained.

In the sample, 436 participants developed T2DM (92 self-reported having type 1 diabetes in the U.S. [2 reported T2DM also] and 20 biochemically diagnosed in Finland were included as not having T2DM; exclusion of these participants did not affect the conclusions). Table 1 compares the 436 participants with T2DM with the 6,302 without T2DM. Of the participants reporting T2DM, 86% also reported use of antidiabetic medications. The onset of T2DM was between ages 20 and 59 years (mean 40.8 years), and the participants with T2DM were slightly older than the participants without diabetes ( $48.0 \pm 7.2$  vs.  $43.8 \pm 7.8$  years,  $P < 0.001$ ). After adjustment for age at adult follow-up, women had a higher risk of T2DM than men, and Blacks had a higher risk of T2DM than Whites ( $P$  for both  $< 0.001$ ). Risk of T2DM varied by cohort.

### Childhood BMI and Glucose as Predictors of Adult T2DM

BMI showed weak correlation with glucose ( $r = 0.06$ ). The z-scores of BMI and glucose were significantly associated with incident T2DM, with hazard ratios (HRs) (95% CIs) of 1.55 (1.44, 1.67) and 1.24 (1.13, 1.35), respectively, per z-score

**Table 1—Descriptive characteristics of childhood risk factors for adult self-reported T2DM ( $N = 6,738$ )**

|                                                                   | T2DM       | Not T2DM     | <i>P</i> diff |
|-------------------------------------------------------------------|------------|--------------|---------------|
| Overall, <i>n</i> (%)                                             | 436 (6.5)  | 6,302 (93.5) |               |
| Age at adult follow-up (years)                                    |            |              |               |
| Mean (SD)                                                         | 48.0 (7.2) | 43.8 (7.8)   | $<0.001$      |
| Range                                                             | 27–62      | 20–62        |               |
| Age at T2DM occurrence (years)                                    |            |              |               |
| Mean (SD)                                                         | 40.8 (8.7) | NA           | NA            |
| Range                                                             | 20–59      | NA           |               |
| Sex, <i>n</i> (%)                                                 |            |              | 0.011         |
| Male                                                              | 153 (4.8)  | 2,569 (95.2) |               |
| Female                                                            | 283 (6.2)  | 3,733 (93.8) |               |
| Race, <i>n</i> (%)                                                |            |              | $<0.001$      |
| White                                                             | 292 (5.0)  | 4,520 (95.0) |               |
| Black                                                             | 144 (7.4)  | 1,782 (92.6) |               |
| Cohort, <i>n</i> (%)                                              |            |              | $<0.001$      |
| Bogalusa Heart Study                                              | 265 (7.4)  | 2,961 (92.6) |               |
| Minneapolis Children's Cohort (Insulin Study)                     | 13 (4.6)   | 477 (95.4)   |               |
| National Heart, Lung, and Blood Institute Growth and Health Study | 9 (3.0)    | 428 (97.0)   |               |
| Princeton Lipid Research Study                                    | 79 (5.4)   | 709 (94.6)   |               |
| Young Finns Study                                                 | 70 (3.8)   | 1,727 (96.2) |               |

Percent is computed within the row. NA, not applicable; *P* diff, *P* value for difference.

unit after adjustment for cohort, country, sex, race, age, and calendar year of measurement (Table 2). When BMI and glucose were combined into a risk score by using the mean of the two z-scores, the HR was 1.87 (1.72, 2.05) after adjustment for the aforementioned covariates. The positive associations of childhood BMI and glucose with the risk of adult T2DM were observed within each participating cohort (Table 2).

To take follow-up age into account, we plotted Kaplan-Meier curves (Fig. 1A–C) to present the probability for developing T2DM over adult ages (beginning at age 20 years) for BMI, glucose, and risk z-scores (on the basis of BMI and glucose). We categorized each child risk variable by an interval of 0.5-unit z-scores with open-ended extremes and assessed the levels of childhood risk factors associated with cumulative incidence of adult T2DM. Participants in the four lowest z-score categories (z-scores <0.5 in aggregate) of childhood BMI showed similar risk of T2DM, while those with BMI z-scores of

0.5 to <1 and scores  $\geq 1$  had incrementally increased risk of T2DM beginning at age 30 years (Fig. 1A). Similar patterns were observed for childhood glucose category, although risk difference is minimal between the childhood glucose z-score 0.5 to <1 and  $\geq 1$  categories. Participants with the risk score (BMI and glucose) >1 had 15% and 28% risk of T2DM at ages 40 and 50 years compared with 12.5% and 18% in those with the risk score 0.5 to <1 and with 6% and 3.5% in those with the risk score <0.5 at ages 40 and 50 years, respectively.

The z-scores from –1 to 1 for BMI and glucose are back-transformed to natural units in Supplementary Table 1. Focusing on the higher z-scores, which are significantly associated with development of adult T2DM, for each age and sex subgroup, the mean absolute glucose level of z-score of 0.5 ranged from 83.8 to 91.8 mg/dL, and the mean absolute glucose level of a z-score of 1 ranged from 88.4 to 99.4 mg/dL. Each of these levels is lower than the historically defined cut

point for impaired fasting glucose of 100 mg/dL. Mean BMI cut points at a z-score of 0.5 ranged between the 75th and 90th percentiles, and mean BMI cut points at a BMI z-score of 1 ranged between the 85th and 95th percentiles, all below the Centers for Disease Control and Prevention–defined percentiles for obesity (19).

### Insulin as an Additional Predictor

Childhood fasting insulin was assessed in 5,196 participants in whom childhood BMI and glucose were also assessed. The correlation coefficient was 0.39 between childhood  $\ln(\text{insulin})$  and BMI z-scores and was 0.18 between childhood  $\ln(\text{insulin})$  and glucose z-scores. After adjustment for BMI or BMI and glucose in childhood, childhood  $\ln(\text{insulin})$  was positively associated with risk of adult T2DM overall and in each participating study (Table 2). Kaplan-Meier curves show that risk of adult T2DM increased at  $\ln(\text{insulin})$  z-score levels of at least 0.5 (Fig. 1D). Similar Kaplan-Meier patterns were observed for the BMI, glucose, and  $\ln(\text{insulin})$  risk

**Table 2—Multivariable analysis for the association of childhood BMI, glucose, and  $\ln(\text{insulin})$  z-scores with adult T2DM**

| Model                                                    | Overall           | BHS               | Princeton         | YFS               | NHGS + MN Insulin |
|----------------------------------------------------------|-------------------|-------------------|-------------------|-------------------|-------------------|
| <b>BMI and glucose</b>                                   |                   |                   |                   |                   |                   |
| <i>n</i> T2DM/ <i>N</i>                                  | 436/6,738         | 265/3,226         | 79/788            | 70/1,797          | 22/927            |
| Multivariable model                                      |                   |                   |                   |                   |                   |
| BMI                                                      |                   |                   |                   |                   |                   |
| HR (95% CI)                                              | 1.55 (1.44, 1.67) | 1.52 (1.39, 1.66) | 1.40 (1.15, 1.69) | 2.02 (1.57, 2.62) | 1.84 (1.40, 2.42) |
| <i>P</i> value                                           | <0.001            | <0.001            | <0.001            | <0.001            | <0.001            |
| Glucose                                                  |                   |                   |                   |                   |                   |
| HR (95% CI)                                              | 1.24 (1.13, 1.35) | 1.32 (1.16, 1.52) | 1.08 (0.82, 1.42) | 1.22 (1.04, 1.42) | 1.46 (0.89, 2.40) |
| <i>P</i> value                                           | <0.001            | <0.001            | 0.590             | 0.012             | 0.134             |
| Risk score model                                         |                   |                   |                   |                   |                   |
| Mean BMI and glucose                                     |                   |                   |                   |                   |                   |
| HR (95% CI)                                              | 1.87 (1.72, 2.05) | 2.08 (1.81, 2.40) | 1.60 (1.22, 2.10) | 1.64 (1.36, 1.97) | 2.97 (1.93, 4.58) |
| <i>P</i> value                                           | <0.001            | <0.001            | <0.001            | <0.001            | <0.001            |
| <b>BMI, glucose and <math>\ln(\text{insulin})</math></b> |                   |                   |                   |                   |                   |
| <i>n</i> T2DM/ <i>N</i>                                  | 284/5,196         | 198/2,605         | 0/0               | 70/1,797          | 15/789            |
| Multivariable model                                      |                   |                   |                   |                   |                   |
| BMI                                                      |                   |                   |                   |                   |                   |
| HR (95% CI)                                              | 1.44 (1.31, 1.59) | 1.39 (1.24, 1.55) |                   | 1.82 (1.34, 2.48) | 1.62 (1.12, 2.36) |
| <i>P</i> value                                           | <0.001            | <0.001            |                   | <0.001            | 0.011             |
| Glucose                                                  |                   |                   |                   |                   |                   |
| HR (95% CI)                                              | 1.23 (1.10, 1.37) | 1.34 (1.08, 1.68) |                   | 1.20 (1.02, 1.41) | 2.36 (0.99, 5.65) |
| <i>P</i> value                                           | <0.001            | 0.010             |                   | 0.031             | 0.055             |
| $\ln(\text{insulin})$                                    |                   |                   |                   |                   |                   |
| HR (95% CI)                                              | 1.34 (1.16, 1.56) | 1.26 (1.07, 1.50) |                   | 1.33 (0.87, 2.02) | 1.93 (1.09, 3.41) |
| <i>P</i> value                                           | <0.001            | 0.008             |                   | 0.189             | 0.025             |
| Risk score model                                         |                   |                   |                   |                   |                   |
| Mean BMI, glucose, and $\ln(\text{insulin})$             |                   |                   |                   |                   |                   |
| HR (95% CI)                                              | 2.38 (2.08, 2.73) | 2.40 (1.99, 2.90) |                   | 2.11 (1.64, 2.72) | 5.80 (2.98, 11.3) |
| <i>P</i> value                                           | <0.001            | <0.001            |                   | <0.001            | <0.001            |

Cox regression analysis with childhood variable z-scores. The z-scores are age- and sex-standardized deviates on the basis of the i3C distribution. Adjustment is for individual mean age and calendar year across childhood visits, sex, race, country, and cohort. The time to event was computed as age at T2DM occurrence or censoring minus individual mean age across childhood visits. BHS, Bogalusa Heart Study; MN Insulin, Minneapolis Children's Cohort (Insulin Study); NHGS, National Heart, Lung, and Blood Institute Growth and Health Study; Princeton, Princeton Lipid Research Study; YFS, Young Finns Study.

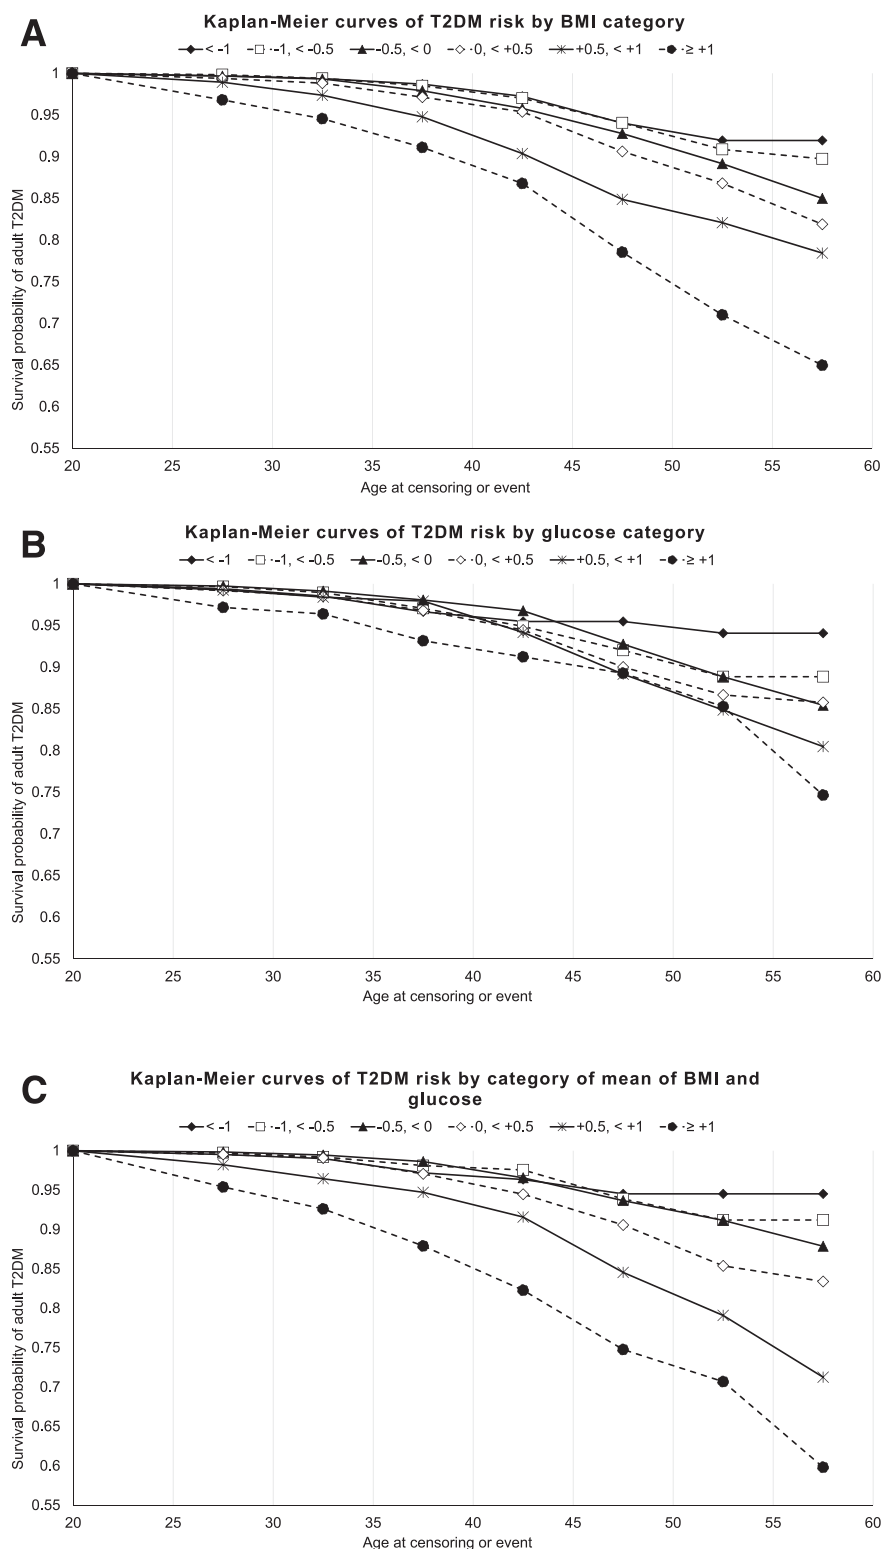

**Figure 1**—Kaplan-Meier figures of T2DM over time, stratified by childhood risk factors: BMI z-score (A), glucose z-score (B), mean BMI and glucose z-scores (C),  $\ln(\text{insulin})$  z-score (D), and mean BMI, glucose, and  $\ln(\text{insulin})$  z-scores (E). The z-scores on the natural scale, corresponding to cut points of 0.5 and 1, are shown in Supplementary Table 1.

score (Fig. 1E). Findings were similar in Supplementary Table 3 in analyses of all available childhood fasting insulin values (6,576 participants; childhood

BMI measured but glucose assessment not required).

To examine whether childhood insulin adds to the prediction of the risk of adult

T2DM beyond that of childhood BMI and glucose, Table 3 shows observed T2DM risk for reclassified individuals with the addition of childhood  $\ln(\text{insulin})$  on the

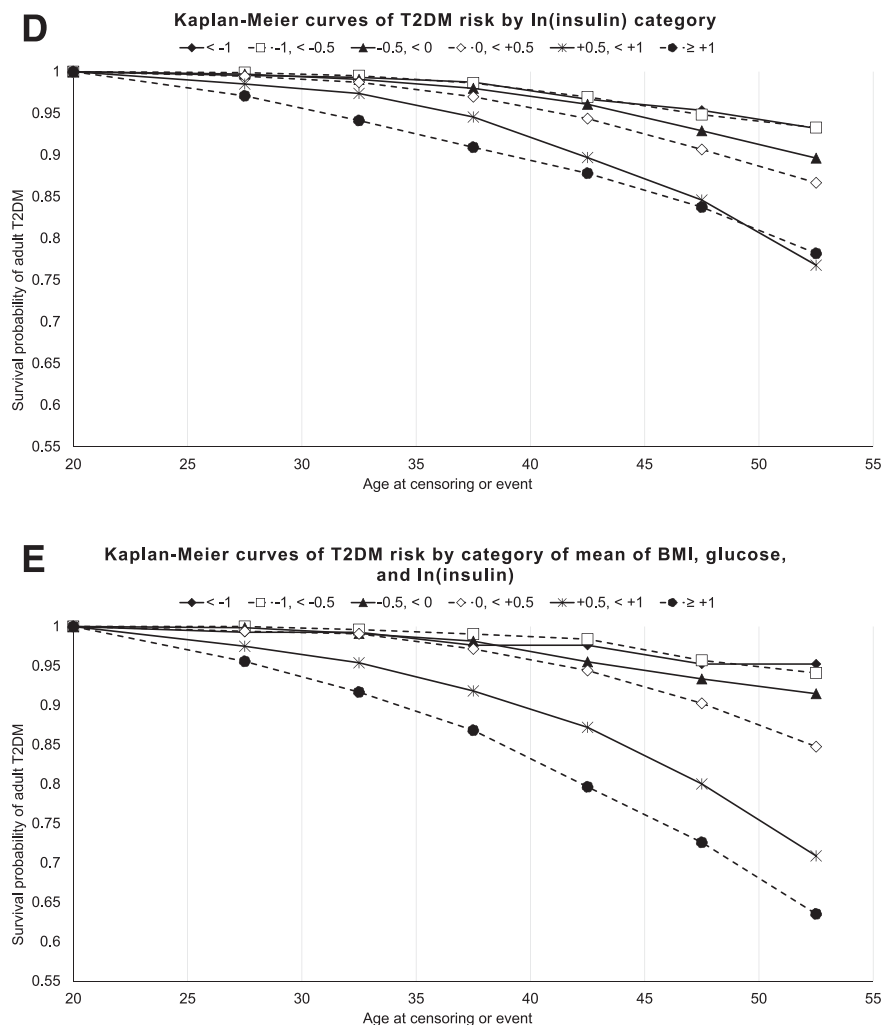

Figure 1—Continued.

basis of childhood BMI and glucose [mean of BMI, glucose, and ln(insulin) z-scores vs. mean of BMI and glucose z-scores]. Increasing risk within a column is indicative of improved discrimination by using the mean BMI, glucose, and ln(insulin) z-scores rather than the mean BMI and glucose z-scores. For each expected risk category of the mean BMI and glucose

z-score, observed risk was higher the higher the expected risk category of mean BMI, glucose, and fasting insulin z-score. The one exception was for the 51 participants whose expected risk was 0.5 to <1 according to the mean BMI and glucose z-score, and expected risk was  $\geq 1$  according to the mean BMI, glucose, and fasting insulin z-score.

#### Prediction in Participants With Lower BMI

The relation of childhood glucose to incident adult T2DM was further assessed by level of BMI (z-scores  $<0$  vs.  $\geq 0$ ). Glucose distribution was similar between the two BMI subgroups. For example, the glucose difference between participants with T2DM and without T2DM was similar

**Table 3—Risk (probability) table for reclassified individuals with the addition of childhood ln(insulin) on the basis of childhood BMI and glucose ( $n$  T2DM/ $N$  = 244/5,196 = 0.055)**

| Mean BMI, glucose, and ln(insulin) z-scores | Mean BMI and glucose z-scores† |               |           |               |          |               |
|---------------------------------------------|--------------------------------|---------------|-----------|---------------|----------|---------------|
|                                             | <0.5                           |               | 0.5 to <1 |               | $\geq 1$ |               |
|                                             | <i>n</i>                       | Risk (SE)     | <i>n</i>  | Risk (SE)     | <i>n</i> | Risk (SE)     |
| <0.5                                        | 4,213                          | 0.040 (0.003) | 162       | 0.056 (0.018) | 2        | *             |
| 0.5 to < 1                                  | 144                            | 0.097 (0.025) | 289       | 0.125 (0.019) | 88       | 0.136 (0.037) |
| $\geq 1$                                    | 4                              | *             | 51        | 0.118 (0.046) | 243      | 0.156 (0.023) |
| All (BMI/glucose marginal risk)             | 4,361                          | 0.042 (0.003) | 502       | 0.102 (0.013) | 333      | 0.150 (0.020) |

\*Risk value ignored in cells with  $n < 5$ . †Increasing risk within a column is indicative of improved discrimination by using the mean BMI, glucose, and ln(insulin) z-scores rather than the mean BMI and glucose z-scores.

for the two BMI groups (glucose mean  $\pm$  SD in BMI z-score  $<0$ :  $0.24 \pm 0.73$ ; in BMI z-score  $>0$ :  $0.28 \pm 0.81$ ), and the range of glucose (75th, 90th, and 95th percentiles) was also similar (0.59, 1.04, and 1.35, respectively, in the BMI z-score  $<0$  and 0.68, 1.22 and 1.36, respectively, in the BMI z-score  $\geq 0$  groups).

Multivariable analysis among participants with BMI z-scores  $<0$  shows that glucose z-score was positively associated with T2DM occurrence, with an HR (95% CI) of 1.21 (1.07, 1.36) after adjustment for BMI z-score as well as cohort, country, sex, race, age, and calendar year of measurement as covariates (Supplementary Table 4). The  $\ln(\text{insulin})$  z-score was also positively associated with T2DM occurrence among participants with BMI z-scores  $<0$ , with an HR of 1.15 (0.92, 1.44) after adjustment for BMI and glucose z-scores as well as the aforementioned covariates (Supplementary Table 4).

While T2DM risk was higher in Blacks, the associations were not modified by race. *P* values for interaction by race in the analysis of BMI, glucose, and insulin were all  $>0.15$ . We compared the Black with the White groups in terms of the BMI, glucose, and insulin analyses (Supplementary Table 5). Overall, there is little difference in risk relationships between Black and White participants regarding the above variables. Childhood BMI, glucose, and  $\ln(\text{insulin})$  were positively associated with the risk of adult T2DM in both the Black and White groups.

## CONCLUSIONS

This population-based study shows that childhood BMI and blood glucose levels, both individually and in combination, were positively associated with the risk of adult T2DM. From age 30 years, the incidence of T2DM started to increase when BMI and glucose z-scores were at least 0.5 and more obviously when they were at least 1, suggesting that potential cut points could be selected within the range of z-scores from 0.5 to 1 for childhood BMI and glucose. While the natural units at these z-scores vary by age and sex, these values are lower than the currently used cut points for childhood obesity (BMI  $\geq 95$ th percentile) and impaired fasting glucose ( $\geq 100$  mg/dL). Childhood insulin was positively associated with the risk of adult T2DM, and adding insulin further increased the separation between the predictions of T2DM

and non-T2DM, namely improved discrimination. Therefore, the prospective nature of this study with longitudinal follow-up into adulthood and adult ascertainment of T2DM not only shows child risk factors for adult T2DM but also shows that the risk begins at lower levels of the risk factors than currently appreciated.

The positive relation between childhood BMI and adult T2DM risk has been previously reported (7,10,13,20). Data from the current study suggest that childhood BMI cut points corresponding to 75th–90th percentile BMI on the basis of Centers for Disease Control and Prevention growth charts are at heightened risk for adult T2DM. This finding contrasts with the BMI criteria for high-risk T2DM put forth by the American Diabetes Association and American Academy of Pediatrics ( $>85$ th percentile) by including children who were traditionally normal weight (2,3). Our data show little correlation between BMI and glucose in childhood and suggest that children with low BMI (BMI z-scores  $<0$ ) can develop adult T2DM by having elevated childhood glucose levels. It is known that children who are normal weight by traditional weight criteria may have insulin resistance (21–24) or an increased percentage of body fat (25). Physiologically, adiposity may be associated with insulin resistance through elevated leptin levels (22) and/or levels of free fatty acids (26). It is reasonable to suggest that overweight/obesity leads to insulin resistance beginning in late adolescence and subsequent T2DM, a pathway also suggested by data from the Bogalusa Heart Study showing that elevated BMI during ages 5–7 years precedes impaired glucose metabolism during ages 12–14 years (27). Our findings advocate for T2DM prevention efforts, even in children whose BMI is in the high normal range.

Previous studies have shown that elevated childhood glucose levels  $>100$  mg/dL predict T2DM risk (3,12,15). In contrast, our findings show that childhood glucose levels  $>84$ – $90$  mg/dL for children aged 3–11 years and  $88$ – $92$  mg/dL for adolescents aged 12–19 years (z-scores  $\geq 0.5$ ) were associated with an increased risk of adult T2DM. Because the survival curve shows a small difference in T2DM risk between the category of a z-score 0.5 to  $<1$  and the categories of glucose z-scores  $<0.5$ , it would be

more conservative to select cut points of high glucose at a z-score value of  $>0.5$ . The cut point  $<100$  mg/dL is in agreement with a report from the Bogalusa Heart Study among 1,849 participants ( $n$  T2DM = 47) showing a threshold of childhood fasting glucose  $\geq 86$  mg/dL, predicting a 2.1 times higher risk for adult T2DM than those with a lower childhood glucose level (14). Another report using data from the Bogalusa Heart Study and Young Finns Study applied the cut point of 75th percentile glucose ( $\sim 86$ – $93$  mg/dL across ages 12–18 years [modified National Cholesterol Education Program definition for metabolic syndrome]), showing that higher glucose level is associated with 1.5 times risk of T2DM (95% CI 0.8, 2.9) ( $n$  T2DM = 37) (28). There are some differences between the Bogalusa study analysis and our analysis in that Bogalusa participants were selected differently and evaluated at a mean age of 35 years (vs. a mean age of 45 years in our study) and that the Bogalusa study did not account for follow-up periods in statistical models and did not explore cut points by age and sex because of the small number of T2DM events (14). In any case, the present data extend T2DM follow-up in both Bogalusa and Young Finn participants. It has been reported that childhood glucose levels of 90–100 mg/dL were associated with a lower  $\beta$ -cell function and thus lower insulin sensitivity (29). Therefore, the findings from the literature and our study support a role of high normal glucose as a predictor of adult T2DM.

Childhood insulin was associated with the risk of T2DM in adulthood, and it has added value in prediction of adult T2DM risk. However, insulin is not routinely measured in most pediatric practices, and values have historically been difficult to standardize and interpret because of wide variability in assays between laboratories and over time as well as fluctuations related to the insulin resistance of puberty (16). While lower childhood insulin may have some degree of predictive value, future studies are needed to further assess its utility as a screening tool for risk of adult T2DM.

This study has several strengths. First, as part of the i3C Consortium, well-established quality control procedures were used for data collection and followed within each participating cohort. Second, a large proportion of i3C had repeated



measurements of cardiometabolic risk variables in childhood, which enabled us to reduce individual variability of measurements. Third, this study was conducted in a large sample, and participants were followed >30 years.

Several limitations of this study should be noted. First, this is an observational study; thus, the possibility of residual confounding cannot be eliminated, and we cannot infer any causal effect. It is conceivable that genetic or in utero factors would contribute to both the childhood measurements and the adult disease. Second, puberty has been suggested to increase insulin resistance (30,31), and with insufficient data on sexual development and insulin resistance, it was not possible to evaluate this association. However, we used age-specific cut points to reduce the influence of age-related pubertal (and growth) changes. Third, the i3C included Black and White participants from the U.S. and Finland, and it is unclear whether the conclusions are generalizable to other races and/or low-income countries. Fourth, self-report was used in six of the i3C cohorts. Although self-report underestimates T2DM occurrence, most self-reports of T2DM are probably correct. This concept is supported by the use of antidiabetic medications because it is commonly known that only a small proportion of people with adult T2DM are not treated with medications. Previous reports on the quality of information obtained from self-report on diabetes in middle-aged populations have shown moderate to high sensitivity (66–84%), high specificity (97–99.7%), and high reliability (92–97%) (32–34). The Finnish cohort used its biochemical test at clinic visits and its national medical database to ascertain T2DM.

In conclusion, childhood BMI and glucose, individually and in combination, are predictors of adult T2DM risk at levels currently considered to be mostly within the normal range. Insulin has the potential to be an additional predictor, and its clinical utility could be improved by developing a more standardized approach to the measurement in the future. The provisionally suggested cut points, which are lower than currently defined as abnormal, suggest revisiting the criteria of childhood BMI and glucose as predictors of adult T2DM risk and initiating

lifestyle interventions at lower BMI and glucose thresholds.

**Funding.** This work was supported by National Heart, Lung, and Blood Institute (grant R01-HL-121230). Harmonization and other data work before obtaining National Institutes of Health funding was supported by the Australian National Health and Medical Research Council Project (grants APP1098369 and APP211316); the Academy of Finland (grants 126925, 121584, 124282, 129378, 117787, and 41071); the Social Insurance Institution of Finland; Kuopio, Tampere, and Turku University Hospital Medical Funds; Juho Vainio Foundation; Paavo Nurmi Foundation; Finnish Foundation of Cardiovascular Research; Finnish Cultural Foundation; Sigrid Juselius Foundation; and Yrjö Jahnsson Foundation.

**Duality of Interest.** No potential conflicts of interest relevant to this article were reported.

**Author Contributions.** T.H. wrote the manuscript and analyzed data. D.R.J. provided oversight for data analysis. A.R.S. contributed to the discussion and reviewed/edited the manuscript. L.A.B., T.L.B., S.R.D., T.D., N.H.-K., M.J., K.A.M., R.J.P., O.T.R., E.M.U., A.V., and J.G.W. contributed to the study design and data collection and reviewed/edited the manuscript. J.S. contributed to study design and data collection and designed, reviewed, and edited the manuscript. J.S. is the guarantor of this work and, as such, had full access to all the data in the study and takes responsibility for the integrity of the data and accuracy of the data analysis. **Prior Presentation.** Parts of this article were presented in abstract form at the American Heart Association EPI|Lifestyle 2020 Scientific Sessions, Phoenix, AZ, 3–6 March 2020.

## References

- World Health Organization. *Global Report on Diabetes*. Geneva, Switzerland, World Health Organization, 2016, pp. 1–88
- Copeland KC, Silverstein J, Moore KR, et al.; American Academy of Pediatrics. Management of newly diagnosed type 2 diabetes mellitus (T2DM) in children and adolescents [published correction appears in *Pediatrics* 2013;131:1014]. *Pediatrics* 2013;131:364–382
- Arslanian S, Bacha F, Grey M, Marcus MD, White NH, Zeitler P. Evaluation and management of youth-onset type 2 diabetes: a position statement by the American Diabetes Association. *Diabetes Care* 2018;41:2648–2668
- Mayer-Davis EJ, Lawrence JM, Dabelea D, et al.; SEARCH for Diabetes in Youth Study. Incidence trends of type 1 and type 2 diabetes among youths, 2002–2012. *N Engl J Med* 2017;376:1419–1429
- Eriksson JG, Kajantie E, Lampl M, Osmond C. Trajectories of body mass index amongst children who develop type 2 diabetes as adults. *J Intern Med* 2015;278:219–226
- Abbasi A, Juszczak D, van Jaarsveld CHM, Gulliford MC. Body mass index and incident type 1 and type 2 diabetes in children and young adults: a retrospective cohort study. *J Endocr Soc* 2017;1:524–537
- Franks PW, Hanson RL, Knowler WC, et al. Childhood predictors of young-onset type 2 diabetes. *Diabetes* 2007;56:2964–2972
- Juonala M, Magnussen CG, Berenson GS, et al. Childhood adiposity, adult adiposity, and cardiovascular risk factors. *N Engl J Med* 2011;365:1876–1885
- Lawlor DA, Davey Smith G, Clark H, Leon DA. The associations of birthweight, gestational age and childhood BMI with type 2 diabetes: findings from the Aberdeen Children of the 1950s cohort. *Diabetologia* 2006;49:2614–2617
- Zamora-Kapoor A, Fyfe-Johnson A, Omidpanah A, Buchwald D, Sinclair K. Risk factors for pre-diabetes and diabetes in adolescence and their variability by race and ethnicity. *Prev Med* 2018;115:47–52
- Zimmermann E, Bjerregaard LG, Gamborg M, Vaag AA, Sørensen TIA, Baker JL. Childhood body mass index and development of type 2 diabetes throughout adult life—a large-scale Danish cohort study. *Obesity (Silver Spring)* 2017;25:965–971
- Vijayakumar P, Nelson RG, Hanson RL, Knowler WC, Sinha M. HbA1c and the prediction of type 2 diabetes in children and adults. *Diabetes Care* 2017;40:16–21
- Nguyen QM, Srinivasan SR, Xu JH, Chen W, Kietlyka L, Berenson GS. Utility of childhood glucose homeostasis variables in predicting adult diabetes and related cardiometabolic risk factors: the Bogalusa Heart Study. *Diabetes Care* 2010;33:670–675
- Nguyen QM, Srinivasan SR, Xu JH, Chen W, Berenson GS. Fasting plasma glucose levels within the normoglycemic range in childhood as a predictor of prediabetes and type 2 diabetes in adulthood: the Bogalusa Heart Study. *Arch Pediatr Adolesc Med* 2010;164:124–128
- Morrison JA, Glueck CJ, Wang P. Childhood risk factors predict cardiovascular disease, impaired fasting glucose plus type 2 diabetes mellitus, and high blood pressure 26 years later at a mean age of 38 years: the Princeton-lipid research clinics follow-up study. *Metabolism* 2012;61:531–541
- Sabin MA, Magnussen CG, Juonala M, et al. Insulin and BMI as predictors of adult type 2 diabetes mellitus. *Pediatrics* 2015;135:e144–e151
- Brambilla P, La Valle E, Falbo R, et al. Normal fasting plasma glucose and risk of type 2 diabetes. *Diabetes Care* 2011;34:1372–1374
- Sinaiko AR, Jacobs DR Jr, Woo JG, et al. The International Childhood Cardiovascular Cohort (i3C) Consortium outcomes study of childhood cardiovascular risk factors and adult cardiovascular morbidity and mortality: design and recruitment. *Contemp Clin Trials* 2018;69:55–64
- Centers for Disease Control and Prevention. Clinical Growth Charts. Accessed 10 June 2020. Available from [https://www.cdc.gov/growthcharts/clinical\\_charts.htm](https://www.cdc.gov/growthcharts/clinical_charts.htm)
- Petkeviciene J, Klumbiene J, Kriaucioniene V, Raskiliene A, Sakyte E, Ceponiene I. Anthropometric measurements in childhood and prediction of cardiovascular risk factors in adulthood: Kaunas cardiovascular risk cohort study. *BMC Public Health* 2015;15:218
- Ouyang F, Christoffel KK, Brickman WJ, et al. Adiposity is inversely related to insulin sensitivity in relatively lean Chinese adolescents: a population-based twin study. *Am J Clin Nutr* 2010;91:662–671



22. Xu L, Li M, Yin J, et al. Change of body composition and adipokines and their relationship with insulin resistance across pubertal development in obese and nonobese Chinese children: the BCAMS study. *Int J Endocrinol* 2012;2012:389108
23. Taniguchi A, Fukushima M, Sakai M, et al. Serum nonesterified fatty acids are increased in nonobese Japanese type 2 diabetic patients with microalbuminuria. *Diabetes Care* 2001;24:1847–1849
24. Sinaiko AR, Steinberger J, Moran A, et al. Relation of body mass index and insulin resistance to cardiovascular risk factors, inflammatory factors, and oxidative stress during adolescence. *Circulation* 2005;111:1985–1991
25. Steinberger J, Sinaiko AR, Kelly AS, et al. Cardiovascular risk and insulin resistance in childhood cancer survivors. *J Pediatr* 2012;160:494–499
26. Frohnert BI, Jacobs DR Jr., Steinberger J, Moran A, Steffen LM, Sinaiko AR. Relation between serum free fatty acids and adiposity, insulin resistance, and cardiovascular risk factors from adolescence to adulthood. *Diabetes* 2013;62:3163–3169
27. Srinivasan SR, Myers L, Berenson GS. Temporal association between obesity and hyperinsulinemia in children, adolescents, and young adults: the Bogalusa Heart Study. *Metabolism* 1999;48:928–934
28. Magnussen CG, Koskinen J, Chen W, et al. Pediatric metabolic syndrome predicts adulthood metabolic syndrome, subclinical atherosclerosis, and type 2 diabetes mellitus but is no better than body mass index alone: the Bogalusa Heart Study and the Cardiovascular Risk in Young Finns Study. *Circulation* 2010;122:1604–1611
29. Tfayli H, Lee S, Arslanian S. Declining beta-cell function relative to insulin sensitivity with increasing fasting glucose levels in the nondiabetic range in children. *Diabetes Care* 2010;33:2024–2030
30. Goran MI, Gower BA. Longitudinal study on pubertal insulin resistance. *Diabetes* 2001;50:2444–2450
31. Ball GD, Huang TT, Gower BA, et al. Longitudinal changes in insulin sensitivity, insulin secretion, and beta-cell function during puberty. *J Pediatr* 2006;148:16–22
32. Kehoe R, Wu SY, Leske MC, Chylack LT Jr. Comparing self-reported and physician-reported medical history. *Am J Epidemiol* 1994;139:813–818
33. Huerta JM, Tormo MJ, Egea-Caparrós JM, Ortola-Devesa JB, Navarro C. Accuracy of self-reported diabetes, hypertension and hyperlipidemia in the adult Spanish population. DINO study findings. *Rev Esp Cardiol* 2009;62:143–152
34. Okura Y, Urban LH, Mahoney DW, Jacobsen SJ, Rodeheffer RJ. Agreement between self-report questionnaires and medical record data was substantial for diabetes, hypertension, myocardial infarction and stroke but not for heart failure. *J Clin Epidemiol* 2004;57:1096–1103
